# Supplementary material for: Cobalt modification of nickel–iron hydroxide electrocatalysts: a pathway to enhanced oxygen evolution reaction
Source: Royal Society of Chemistry journal article supplement (doi:10.1039/d3ta04805e), 2023-01-01
Supplement: d3ta04805e1.pdf [file d3ta04805e1.pdf]

## Supplementary Information

### **Cobalt Modification of Nickel-Iron Hydroxide Electrocatalysts: A Pathway to Enhanced Oxygen Evolution Reaction**

Joshua Zheyang Soo,<sup>1,\*</sup> Asim Riaz,<sup>2,\*</sup> Felipe Kremer,<sup>3</sup> Frank Brink,<sup>3</sup> Chennupati Jagadish,<sup>1,4</sup>  
Hark Hoe Tan,<sup>1,4</sup> Siva Karuturi <sup>2</sup>

<sup>1</sup> Department of Electronic Materials Engineering, Research School of Physics, The Australian National University, 2601 Acton, Australian Capital Territory, Australia

<sup>2</sup> School of Engineering, The Australian National University, 2601 Acton, Australian Capital Territory, Australia

<sup>3</sup> Centre for Advanced Microscopy, The Australian National University, 2601 Acton, Australian Capital Territory, Australia

<sup>4</sup> ARC Centre of Excellence for Transformative Meta-Optical Systems, The Australian National University, 2601 Acton, Australian Capital Territory, Australia

\*Corresponding e-mail: [joshua.soo@anu.edu.au](mailto:joshua.soo@anu.edu.au); [asim.riaz@anu.edu.au](mailto:asim.riaz@anu.edu.au)

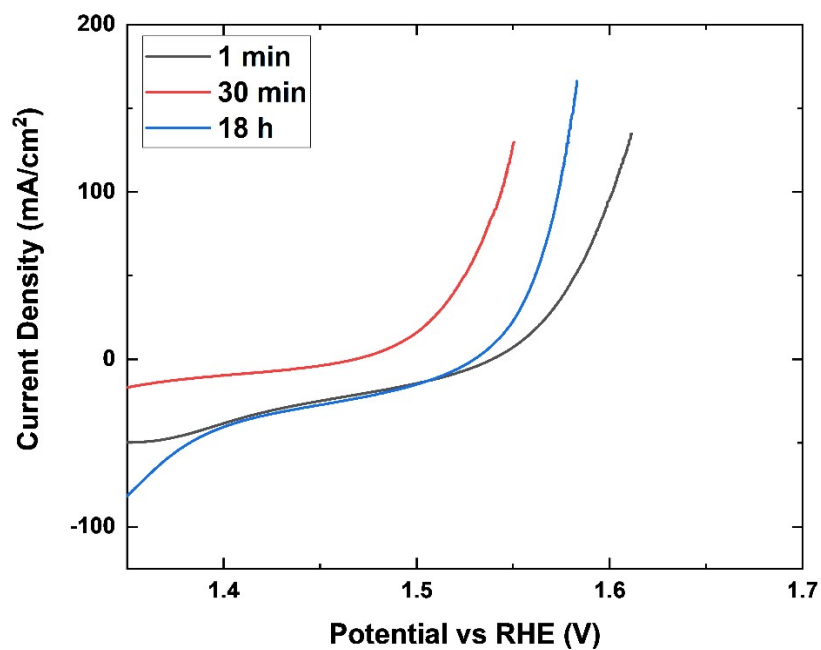

Figure S1: Reverse-scanned LSVs of NiFeCo hydroxide synthesized using 15 mM Co chloride concentration at different corrosion times.

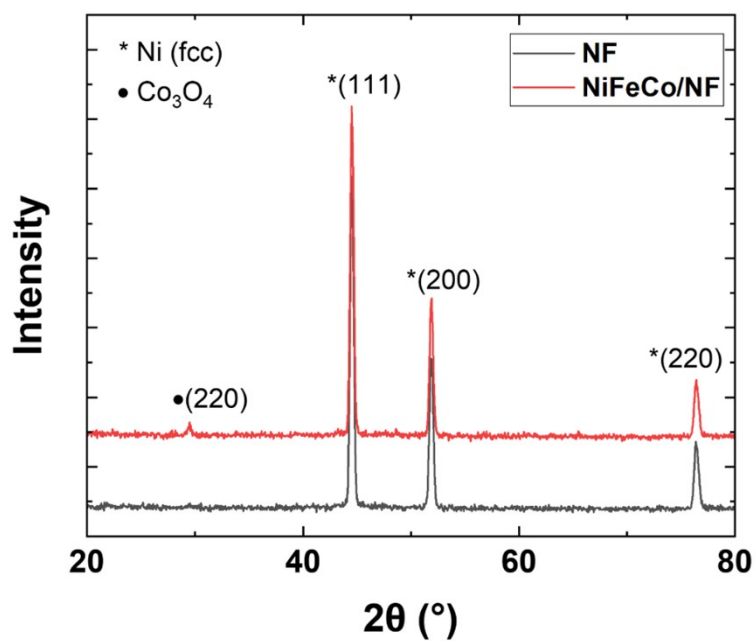

Figure S2: XRD plots of NiFeCo/NF and NF.

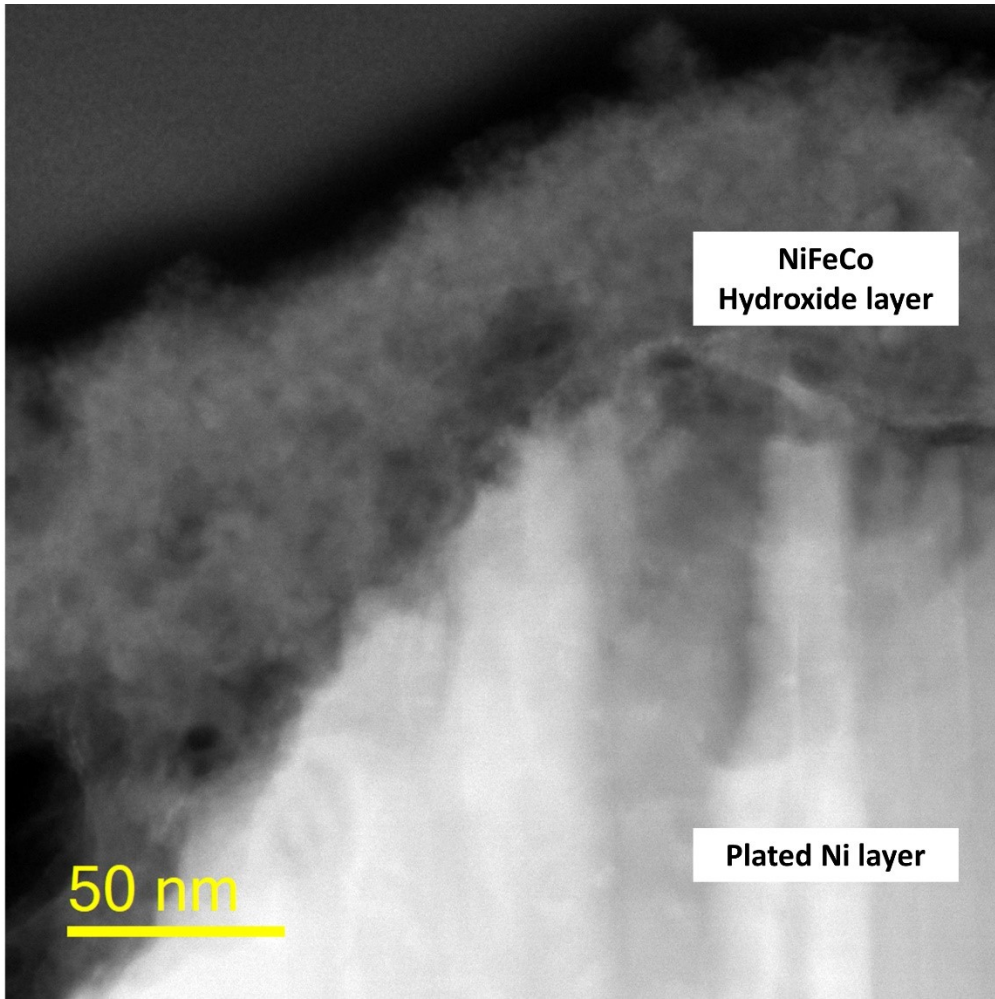

Figure S3: Grayscale of HAADF image of NiFeCo/Si with labelled regions.

**Table S1: Peak assignments of NiFeCo/NF XPS Spectra from Figure 2(d-g).**

| Ni 2p |             |                                          | Fe 2p |             |                                                     |
|-------|-------------|------------------------------------------|-------|-------------|-----------------------------------------------------|
| Peak  | Energy (eV) | Assignment                               | Peak  | Energy (eV) | Assignment                                          |
| 1     | 852.8       | Ni <sup>0</sup> 2p <sub>3/2</sub>        | 1     | 710.6       | Fe <sup>3+</sup> 2p <sub>3/2</sub>                  |
| 2     | 855.6       | Ni <sup>2+</sup> 2p <sub>3/2</sub>       | 2     | 712.5       | Fe <sup>3+</sup> 2p <sub>3/2</sub> ,<br>(multiplet) |
| 3     | 857.2       | Ni <sup>3+</sup> 2p <sub>3/2</sub>       |       |             |                                                     |
| 4     | 861.1       | Ni <sup>2+</sup> 2p <sub>3/2</sub> , sat |       |             |                                                     |
| 5     | 863.7       | Ni <sup>3+</sup> 2p <sub>3/2</sub> , sat |       |             |                                                     |

  

| Co 2p |             |                                          | O 1s |             |            |
|-------|-------------|------------------------------------------|------|-------------|------------|
| Peak  | Energy (eV) | Assignment                               | Peak | Energy (eV) | Assignment |
| 1     | 781.0       | Co <sup>2+</sup> 2p <sub>3/2</sub>       | 1    | 529.9       | M-O bonds  |
| 2     | 782.4       | Co <sup>3+</sup> 2p <sub>3/2</sub>       | 2    | 531.6       | M-OH bonds |
| 3     | 786.8       | Co <sup>2+</sup> 2p <sub>3/2</sub> , sat | 3    | 532.9       | Adsorbates |
| 4     | 789.8       | Co <sup>3+</sup> 2p <sub>3/2</sub>       |      |             |            |

**Table S2: Comparison of NiFeCo/NF with other NiFeCo electrocatalysts and Ni-based electrocatalysts synthesized using solution corrosion method.**

| Sample | Synthesis Method | OER overpotential at | Ref |
|--------|------------------|----------------------|-----|
|--------|------------------|----------------------|-----|

| <b>10 mA/cm<sup>2</sup> (mV)</b>         |                           |            |                 |
|------------------------------------------|---------------------------|------------|-----------------|
| <b>NiFeCo/NF</b>                         | <b>Solution corrosion</b> | <b>195</b> | <b>Own work</b> |
| NiFeCo/Iron foil                         | Hydrothermal              | 300        | 1               |
| NiFeCo/NF                                | CV electrodeposition      | 207        | 2               |
| NiFeCo/Ti felt                           | Co-precipitation          | 249        | 3               |
| NiFeOOH/NiFeS <sub>x</sub> /NiFe<br>foam | Solution corrosion        | 227        | 4               |
| NiFe LDH/NF                              | Solution corrosion        | 180        | 5               |
| NiFe LDH/NF                              | Solution corrosion        | 269        | 6               |

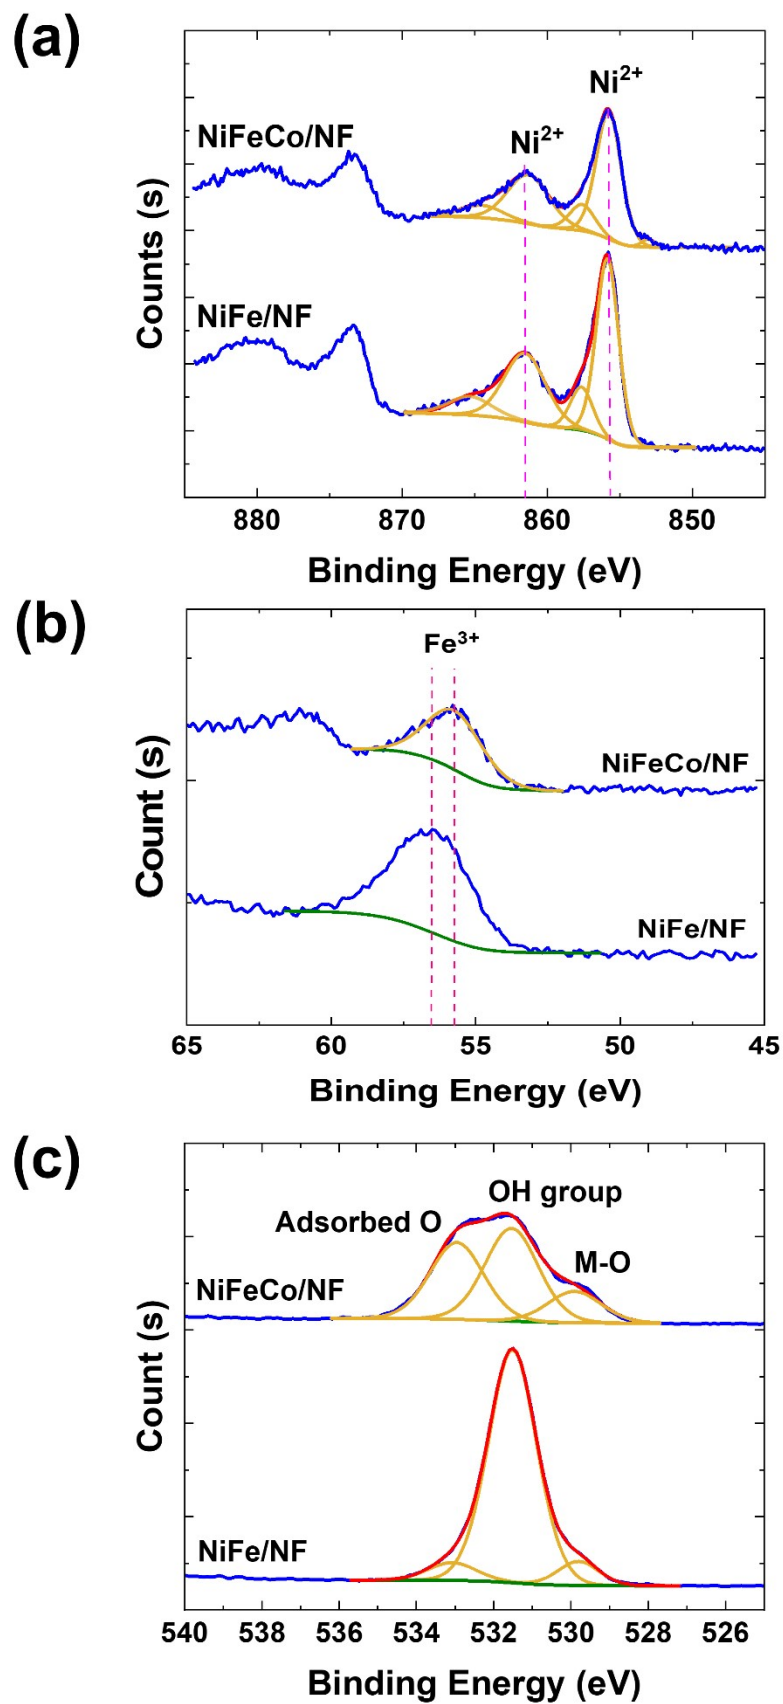

Figure S4: (a) Ni 2p, (b) Fe 3p, and (c) O 1s XPS spectra of NiFe/Si and NiFeCo/Si

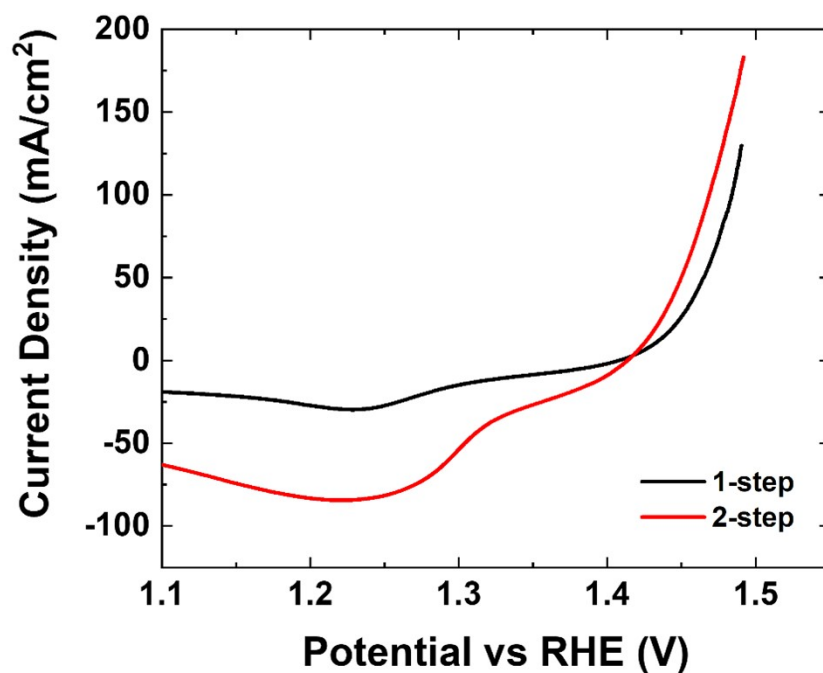

Figure S5: LSVs of NiFeCo/NF synthesized using 1 or 2-step processes.

Table S3: Randles cell equivalent circuit values of NiFe/Si and NiFeCo/Si

| Sample    | $R_s$ | $R_{ct}$ | CPE ( $Y_0$ ) | CPE (N) |
|-----------|-------|----------|---------------|---------|
| NiFe/Si   | 0.965 | 0.590    | 0.028         | 0.651   |
| NiFeCo/Si | 0.812 | 0.269    | 0.092         | 0.789   |

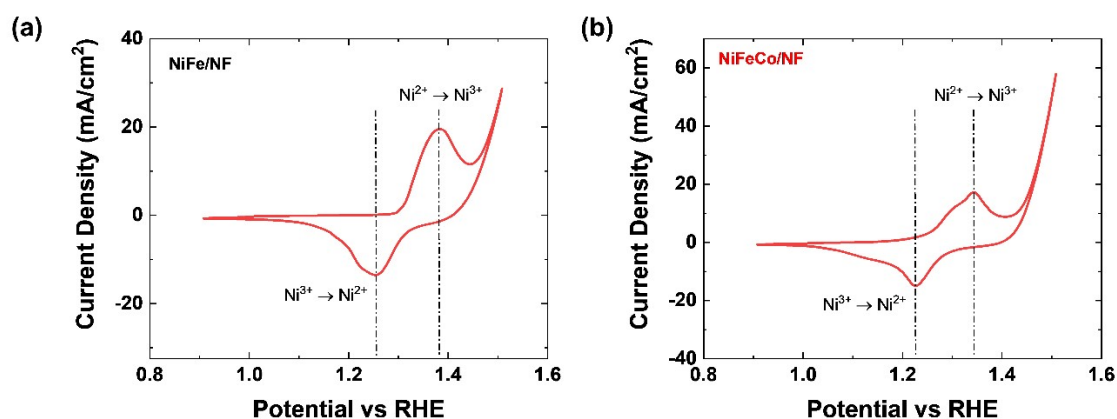

Figure S6: CV of (a) NiFe/NF and (b) NiFeCo/NF with labelled  $Ni^{2+}$ - $Ni^{3+}$  redox couple.

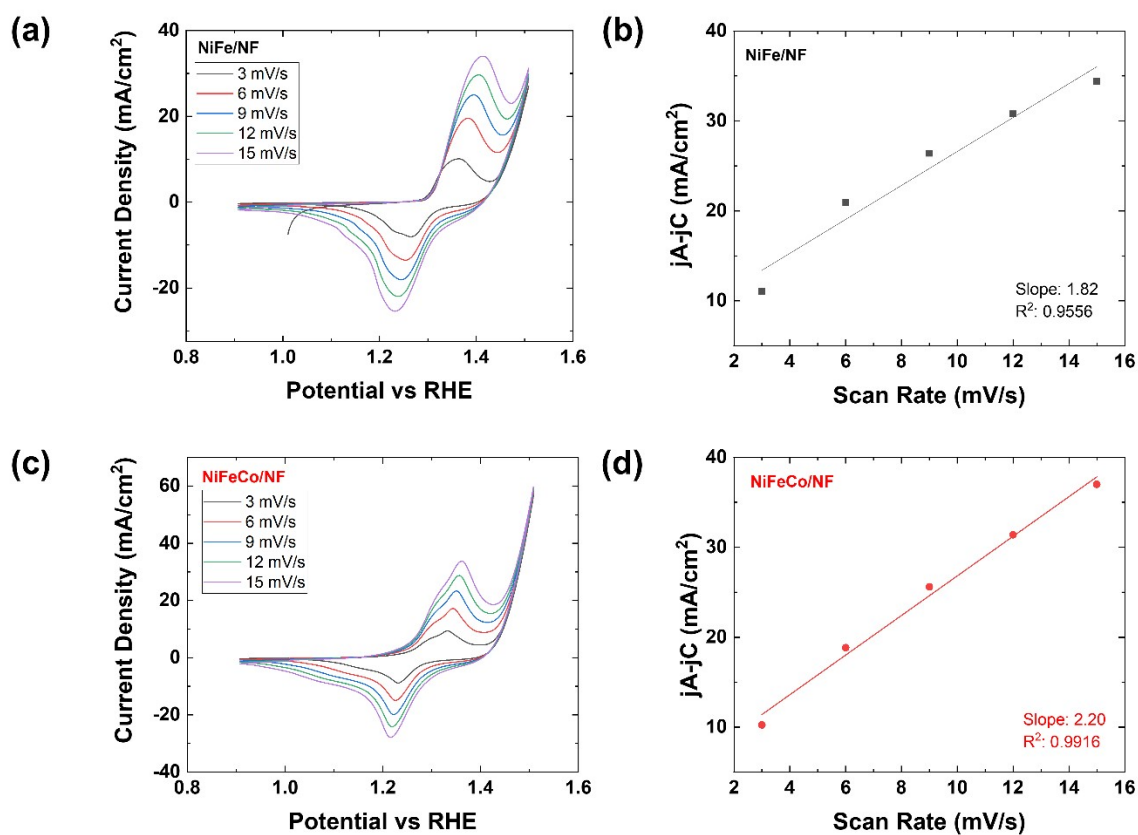

Figure S7: CV graphs at various scan rates (3 – 15 mV/s) and corresponding linear fitted plots of the maximum difference of anodic and cathodic sweep current densities vs scan rate for: (a-b) NiFe/NF and (c-d) NiFeCo/NF.



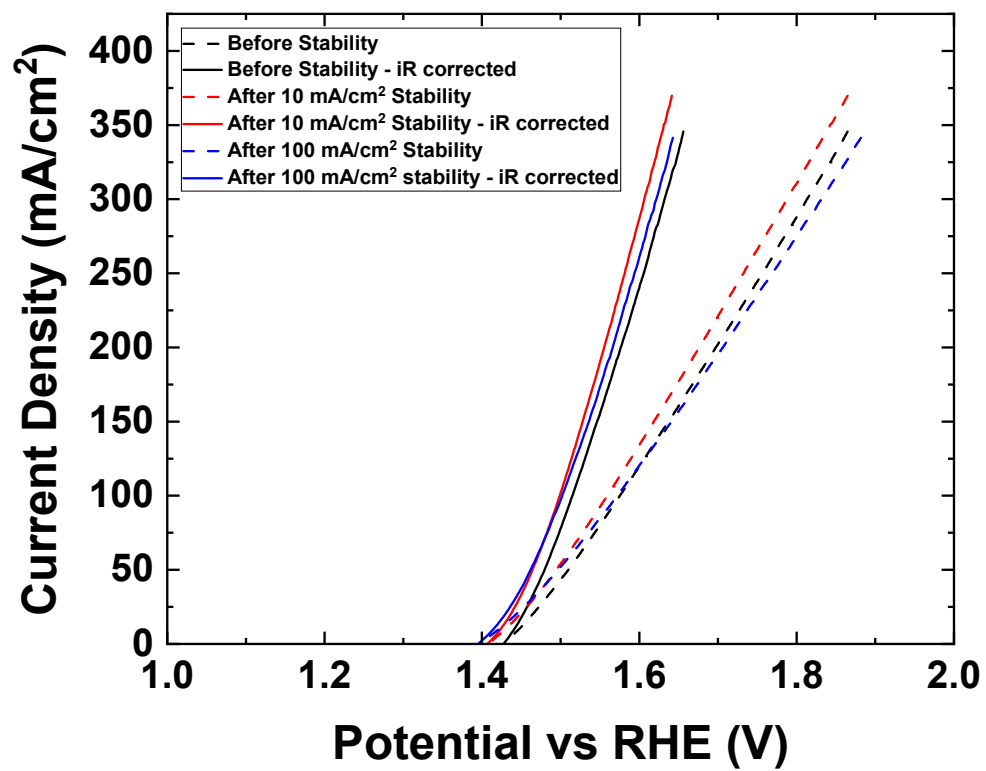

Figure S8: LSVs of NiFeCo/NF before and after chronopotentiometry (stability).

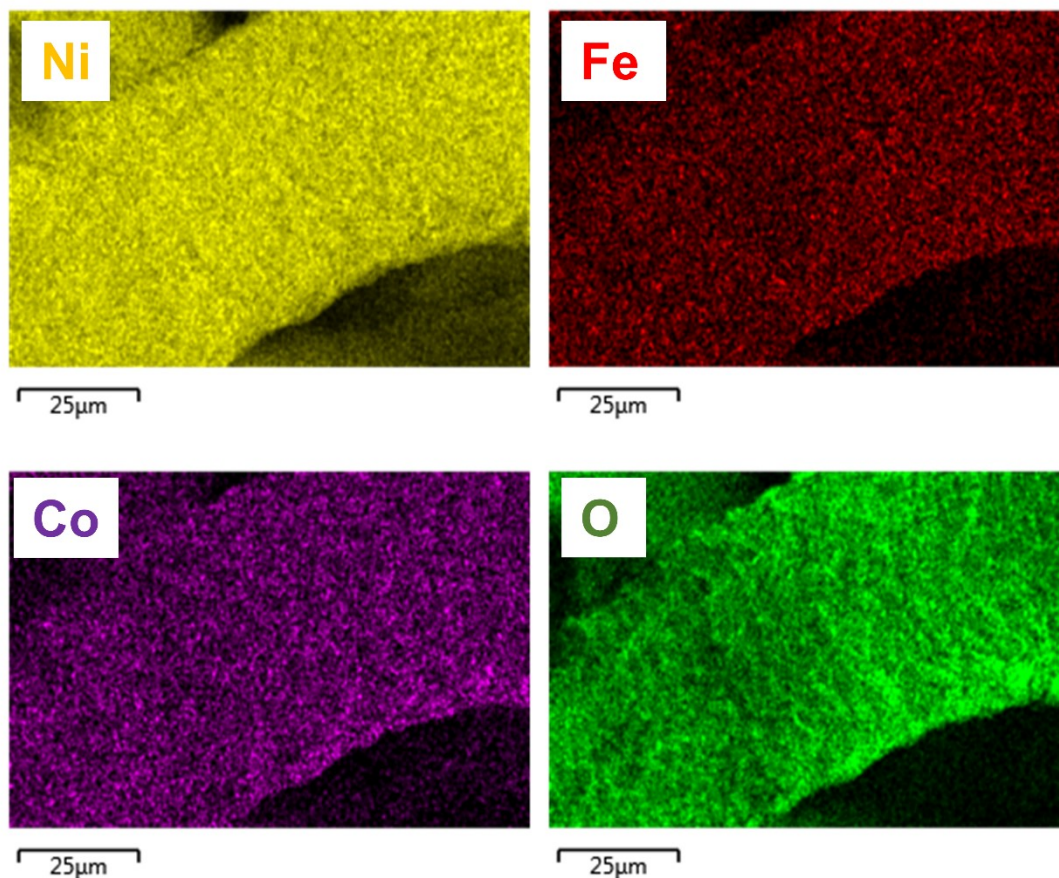

Figure S9: EDX of NiFeCo/NF surface after chronopotentiometric measurements.

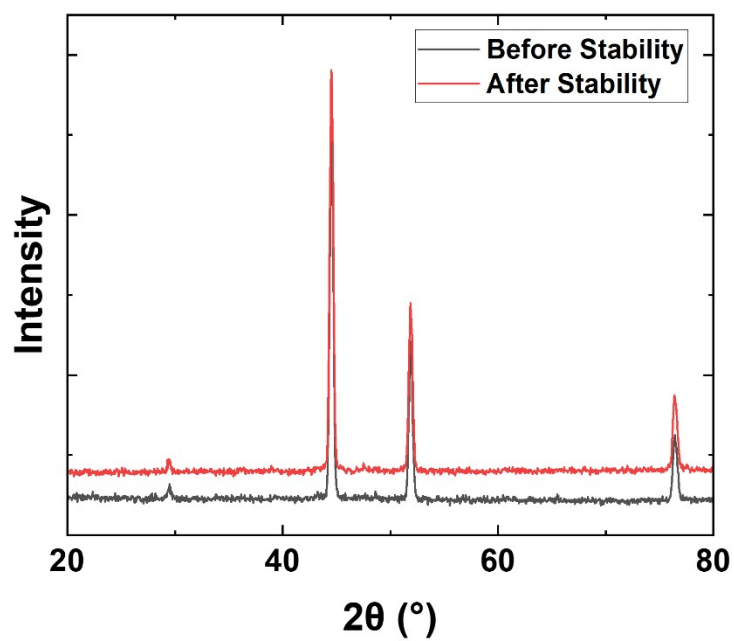

Figure S10: XRD plots of NiFeCo/NF before and after chronopotentiometry (stability) measurements.

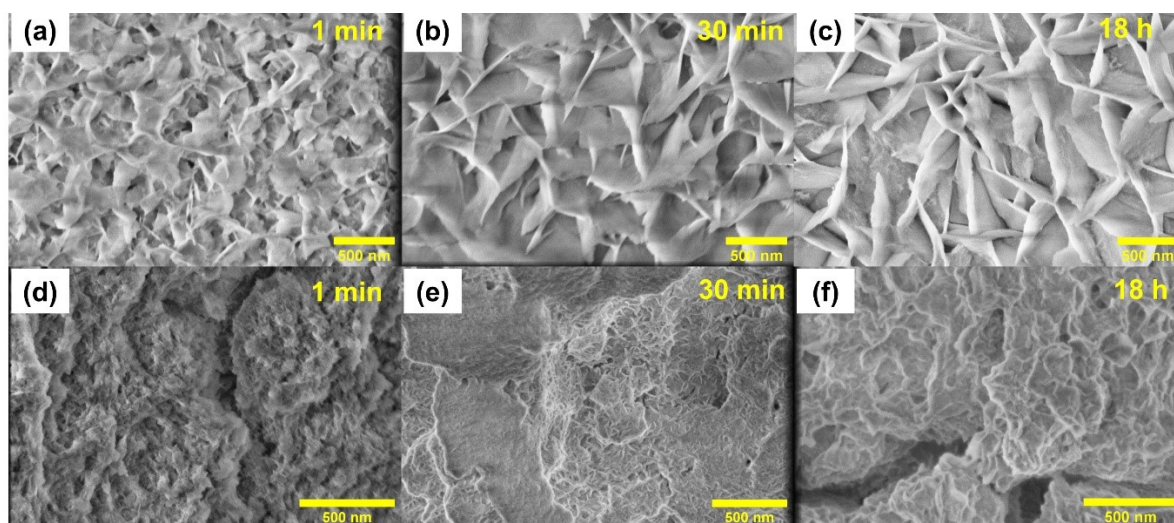

Figure S11: SEM images of NiFeCo synthesized using (a-c): Co chloride precursor and (d-f) Co nitrate precursor at different synthesis times.

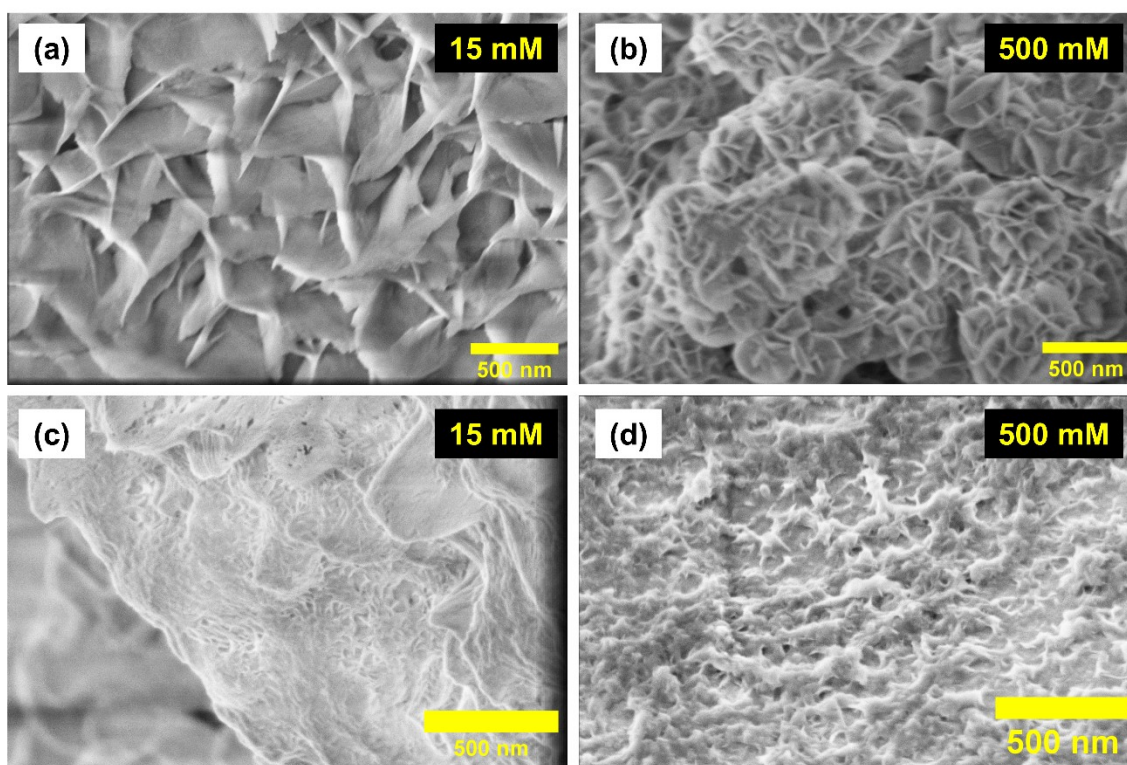

Figure S12: SEM images of NiFeCo/NF synthesized with (a-b) Co chloride precursor and (c-d) Co nitrate precursor; synthesized at 15 mM and 500 mM precursor concentrations, respectively.

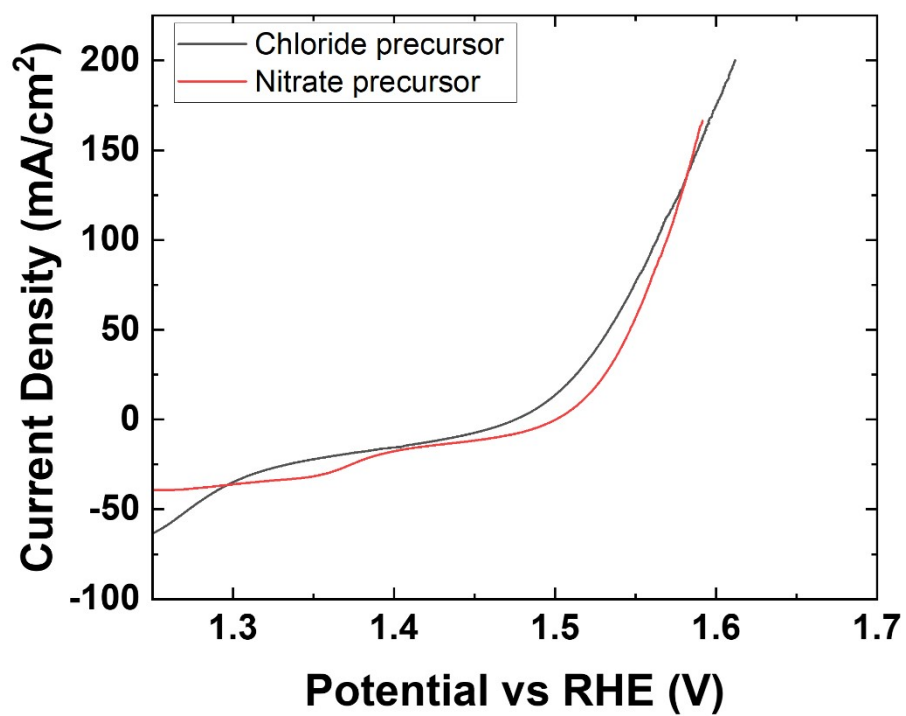

Figure S13: LSVs of NiFeCo/NF synthesized using different Co precursors at 15 mM concentration.

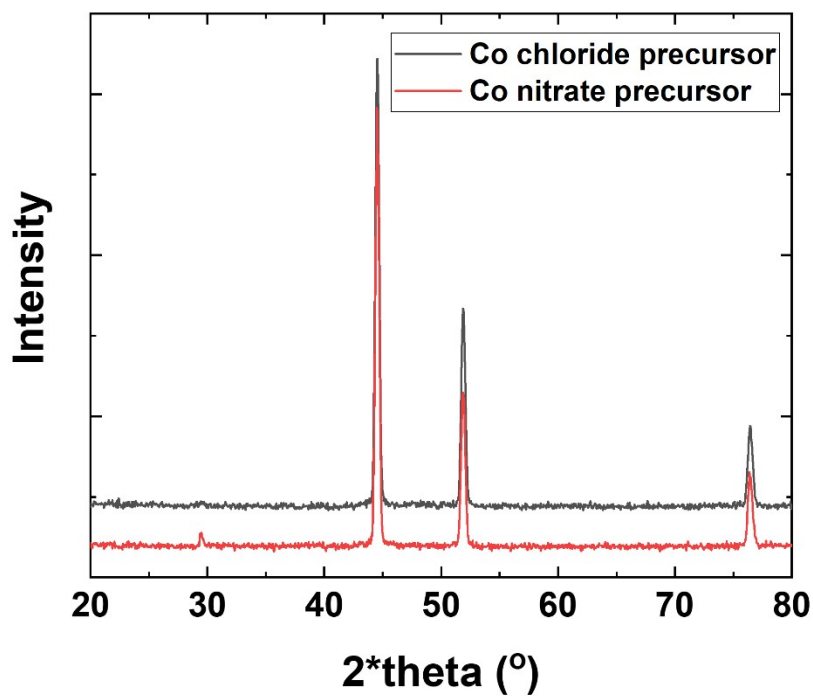

Figure S14: XRD plots of NiFeCo/NF synthesized using Co chloride and Co nitrate precursors at 15 mM precursor concentration.

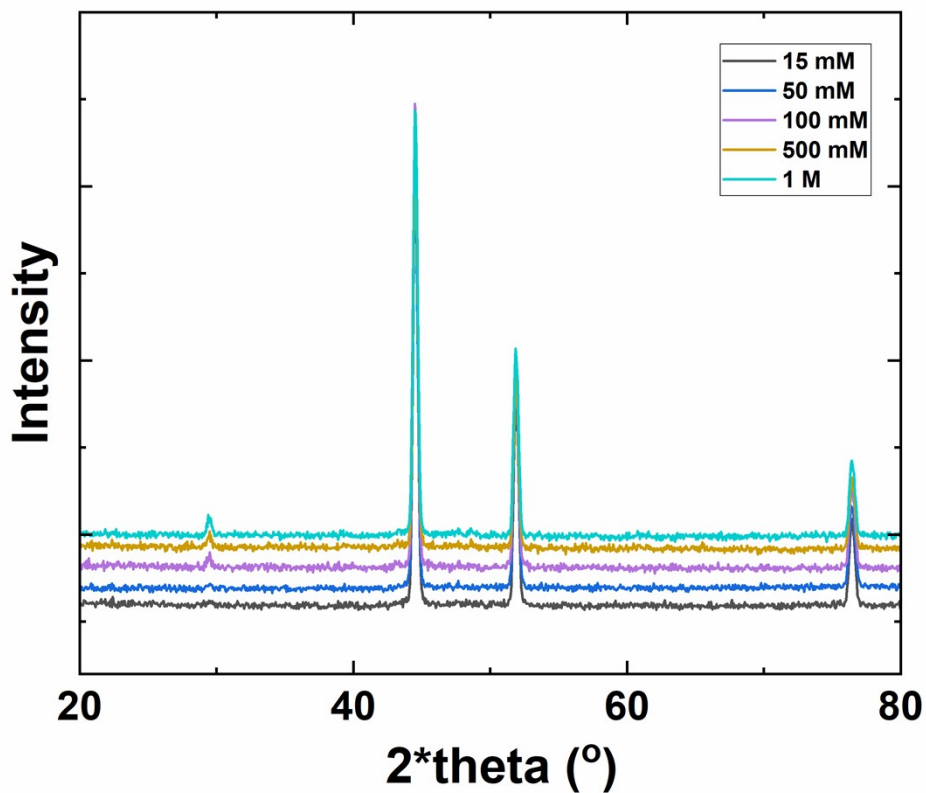

Figure S15: XRD plots of Co-chloride synthesized NiFeCo/NF at different precursor concentrations.

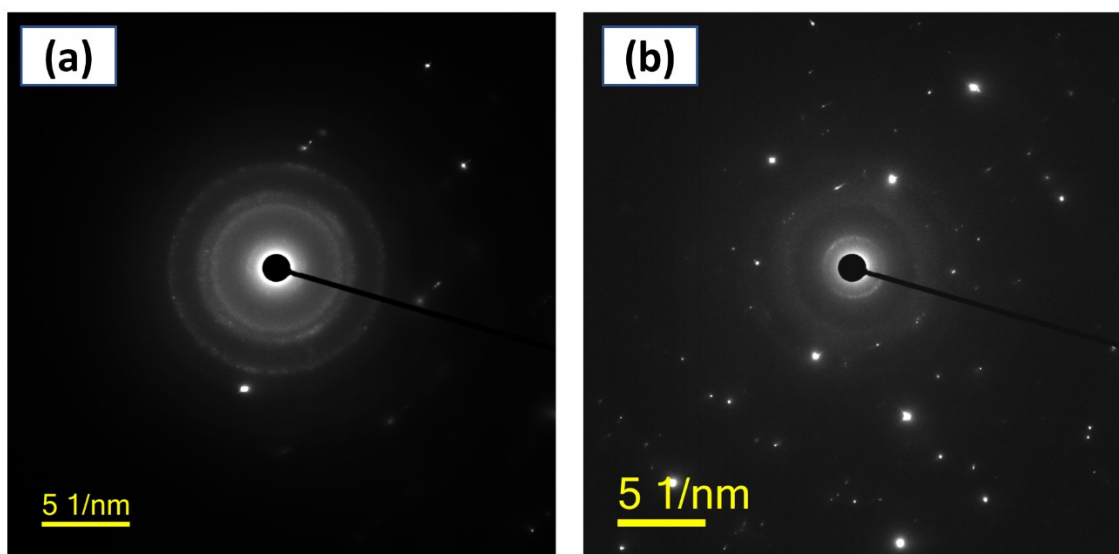

Figure S16: SAED patterns of Co -chloride synthesized NiFeCo/Si synthesized at (a) 15 mM and (b) 1 M precursor concentrations.

Table S4: pH values of Co chloride solution at different concentrations.

| Co chloride concentration (mM) | Solution pH |
|--------------------------------|-------------|
| 15                             | 7.0         |
| 50                             | 7.0         |
| 100                            | 6.7         |
| 500                            | 6.2         |
| 1000                           | 5.7         |

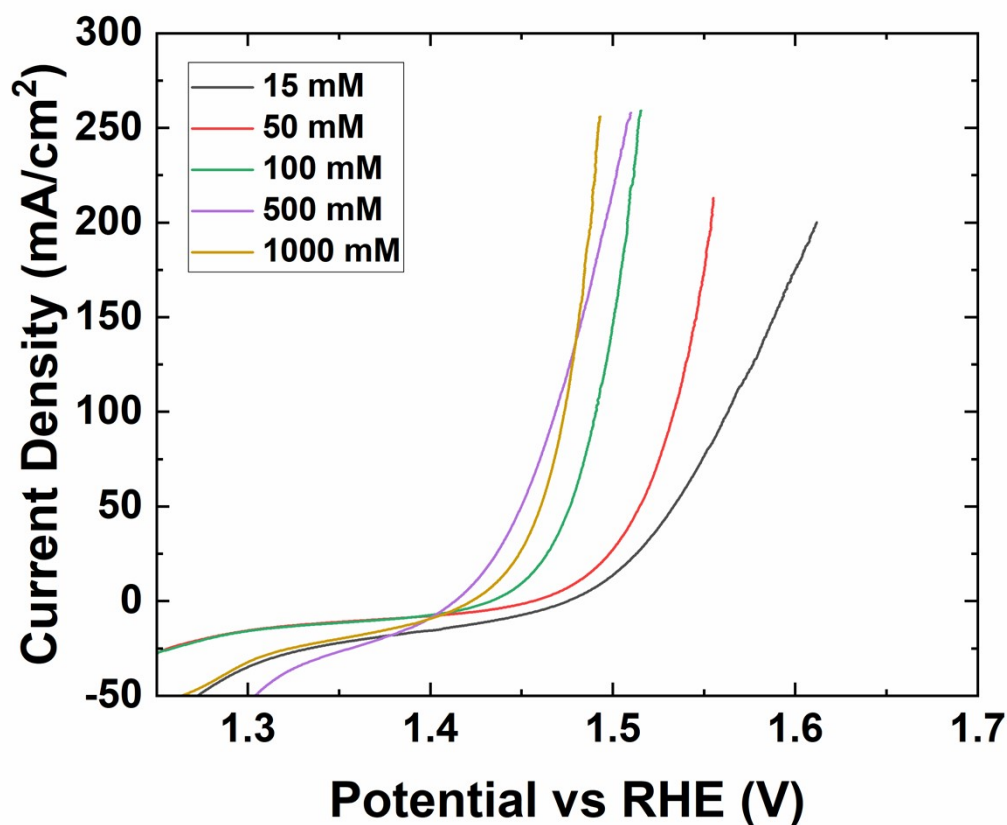

Figure S17: Reverse-scanned LSV of Co-chloride synthesized NiFeCo/NF at different Co chloride concentrations.

Table S5: Estimated  $R_{ct}$  values of Co-chloride synthesized NiFeCo/NF obtained from Nyquist plots in Figure 4(d).

| Precursor Concentration (mM) | $R_{ct}$ of NiFeCo/NF ( $\Omega$ ) |
|------------------------------|------------------------------------|
| 15                           | 1.010                              |
| 50                           | 0.677                              |
| 100                          | 0.570                              |
| 500                          | 0.520                              |
| 1000 (1 M)                   | 0.676                              |

## References:

1. M. L. Lindstrom, R. Gakhar, K. Raja and D. Chidambaram, *Journal of The Electrochemical Society*, 2020, **167**, 046507.
2. H. Y. Jung, J. H. Park, J. C. Ro and S. J. Suh, *ACS Omega*, 2022, **7**, 45636-45641.
3. Y. S. Park, J.-Y. Jeong, M. J. Jang, C.-Y. Kwon, G. H. Kim, J. Jeong, J.-h. Lee, J. Lee and S. M. Choi, *Journal of Energy Chemistry*, 2022, **75**, 127-134.
4. M. Chen, W. Li, Y. Lu, P. Qi, H. Wu, G. Liu, Y. Zhao and Y. Tang, *Journal of Materials Chemistry A*, 2023, **11**, 4608-4618.
5. Y.-F. Song, Z.-Y. Zhang, H. Tian, L. Bian, Y. Bai and Z.-L. Wang, *Chemistry – A European Journal*, 2023, **29**, e202301124.
6. Y. Liu, X. Liang, L. Gu, Y. Zhang, G.-D. Li, X. Zou and J.-S. Chen, *Nature Communications*, 2018, **9**, 2609.
